# Supplementary material for: Effects of ocean acidification on the interaction between calcifying oysters (Ostrea chilensis) and bioeroding sponges (Cliona sp.)
Source: Frontiers journal article supplement (doi:10.3389/fmars.2024.1444863), 2024-10-01
Supplement: Table_1.DOCX [file Table_1.DOCX]

**Table S1.** Mean (±SE) temperature, total alkalinity and dissolved inorganic carbon measured at different timepoints over the course of the experiment.

| pH | pHT | Temperature (°C) | AT (umol kg-1) | DIC (umol kg-1) |
| --- | --- | --- | --- | --- |
| 7.63 | 7.61±0.004 (n=203) | 14.39±0.019 (n=203) | 2297.12±2.79 (n=45) | 2240.66 ± 4.27 (n=45) |
| 7.83 | 7.79±0.005 (n=136) | 14.36±0.025 (n=136) | 2293.38± 3.09 (n=36) | 2170.41 ± 5.64 (n=36) |
| 8.03 | 7.96±0.002 (n=204) | 14.35±0.02 (n=204) | 2296.90±3.37 (n=46) | 2112.77 ± 4.88 (n=46) |
