# Supplementary material for: Effects of ocean acidification on the interaction between calcifying oysters (Ostrea chilensis) and bioeroding sponges (Cliona sp.)
Source: Frontiers journal article supplement (doi:10.3389/fmars.2024.1444863), 2024-10-01
Supplement: Table_2.DOCX [file Table_2.DOCX]

**Table S2.** Mean (±SE) calcification/bioerosion rates. Model statistics are from full linear mixed effect models.

| **Category** | **Treatment** | **Mean (±SE)** | **Model statistics** |
| --- | --- | --- | --- |
| Oysters | 8.03 | 0.86±0.20 | df=59.42 t=1.36 p=0.18 R2=0.15 n=62 |
| 7.83 | 0.66±0.27 |
| 7.63 | 0.39±0.38 |
| Infested oysters | 8.03 | 1.34±0.27 | df=59.00  t=3.83  p<**0.01**  R2=0.20  n=60 |
| 7.83 | 1.02±0.28 |
| 7.63 | -0.19±0.35 |
| Sponges | 8.03 | 2.36±1.03 | df=5.62  t=2.81  p=**0.03**  R2=0.17  n=63 |
| 7.83 | -3.31 ±2.77 |
| 7.63 | -6.46±2.54 |
