# Supplementary material for: Effects of ocean acidification on the interaction between calcifying oysters (Ostrea chilensis) and bioeroding sponges (Cliona sp.)
Source: Frontiers journal article supplement (doi:10.3389/fmars.2024.1444863), 2024-10-01
Supplement: Table_3.DOCX [file Table_3.DOCX]

**Table S3.** Difference between calcification rate of uninfested and infested oysters per pH treatment. Model statistics are from full linear mixed effect models.

| **pH Treatment** | **Model statistics** | |
| --- | --- | --- |
| 8.03 | df=44.00, t=1.46, p=0.15 | R2=0.05, n=46 |
| 7.83 | df = 27.00, t = 0.978, p= 0.34 | R2=0.09, n=32 |
| 7.63 | df = 37.27, t = -1.22, p= 0.23 | R2= 0.18, n=44 |
