# Supplementary material for: Effects of ocean acidification on the interaction between calcifying oysters (Ostrea chilensis) and bioeroding sponges (Cliona sp.)
Source: Frontiers journal article supplement (doi:10.3389/fmars.2024.1444863), 2024-10-01
Supplement: Table_4.DOCX [file Table_4.DOCX]

**Table S4.** Interactive effect of pH and Sponge Infestation (yes/no) on net calcification rate of uninfested oysters and sponge infested oysters. Model statistics are from full linear mixed effect models.

| **Treatment** | **Model statistics** | |
| --- | --- | --- |
| pH | df=117.98, t=1.17, p= 0.24 | R2= 0.14  n= 122 |
| Sponge infestation | df=111.77, t=-1.89, p= **0.06** |
| pH:Sponge Infestation | df=23.96, t=-2.33, p= **0.06** |
