# Supplementary material for: Effects of ocean acidification on the interaction between calcifying oysters (Ostrea chilensis) and bioeroding sponges (Cliona sp.)
Source: Frontiers journal article supplement (doi:10.3389/fmars.2024.1444863), 2024-10-01
Supplement: Table_5.docx [file Table_5.docx]

**Table S5.** Mean (±SE) respiration rates. Model statistics are from full linear mixed effect models.

| **Category** | **Treatment** | **Mean (±SE)** | **Model statistics** |
| --- | --- | --- | --- |
| Oysters | 8.03 | 0.24±0.02 | df=3.12  t=0.70  p=0.53  R2=0.23  n=13 |
| 7.83 | 0.20±0.05 |
| 7.63 | 0.20±0.03 |
| Infested oysters | 8.03 | 0.29±0.11 | df=6.22  t=-0.30  p=0.77  R2=0.19  n=14 |
| 7.83 | 0.28±0.05 |
| 7.63 | 0.36±0.17 |
| Sponges | 8.03 | 0.28±0.033 | df=10.15  t=0.41  p=0.69  R2=0.17  n=13 |
| 7.83 | 0.14±0.051 |
| 7.63 | 0.25±0.056 |
