# Supplementary material for: Effects of ocean acidification on the interaction between calcifying oysters (Ostrea chilensis) and bioeroding sponges (Cliona sp.)
Source: Frontiers journal article supplement (doi:10.3389/fmars.2024.1444863), 2024-10-01
Supplement: Table_6.docx [file Table_6.docx]

**Table S6.** Interactive effect of pH and Sponge Infestation (yes/no) on respiration rate of uninfested oysters and sponge infested oysters. Model statistics are from full linear mixed effect models.

| **Treatment** | **Model statistics** | |
| --- | --- | --- |
| pH | df=23.00, t=-0.54, p= 0.59 | R2= 0.06  n= 27 |
| Sponge infestation | df=23.00, t=-0.60, p= 0.55 |
| pH:Sponge Infestation | df=23.00, t=0.58, p= 0.57 |
