# Supplementary material for: Effects of ocean acidification on the interaction between calcifying oysters (Ostrea chilensis) and bioeroding sponges (Cliona sp.)
Source: Frontiers journal article supplement (doi:10.3389/fmars.2024.1444863), 2024-10-01
Supplement: Table_7.DOCX [file Table_7.DOCX]

**Table S7.** Mean (±SE) clearance rates for different particle size ranges. Model statistics are from full linear mixed effect models.

| **Particle Size Range** | **Category** | **Treatment** | **Mean (±SE)** | **Model statistics** |
| --- | --- | --- | --- | --- |
| >5–60μm | Oysters | 8.03 | 0.74±0.38 | df=4.25  t=1.85  p=0.13  R2=0.74  n=17 |
| 7.83 | 0.46±0.16 |
| 7.63 | 0.03±0.05 |
| Infested oysters | 8.03 | 0.16±0.07 | df=14  t=-0.57  p=0.58  R2=0.02  n=16 |
| 7.83 | 0.47±0.26 |
| 7.63 | 0.32±0.19 |
| Sponges | 8.03 | -0.53±0.13 | df=1.61  t=-0.47  p=0.69  R2=0.04  n=16 |
| 7.83 | -1.28±0.52 |
| 7.63 | -0.45±0.12 |
| >2.5–60μm | Oysters | 8.03 | 0.51±0.21 | df=4.30  t=2.19  p=0.09  R2=0.65  n=17 |
| 7.83 | 0.29±0.07 |
| 7.63 | 0.03±0.05 |
| Infested oysters | 8.03 | 0.12±0.04 | df=14  t=-0.77  p=0.46  R2=0.04  n=16 |
| 7.83 | 0.38±0.17 |
| 7.63 | 0.35±0.14 |
| Sponges | 8.03 | -0.33±0.09 | df=4.98  t=-1.05  p=0.34  R2=0.58  n=16 |
| 7.83 | -0.83±0.31 |
| 7.63 | -0.22±0.13 |
| 2.5–5μm | Oysters | 8.03 | 0.50±0.21 | df=4.24  t=2.18  p=0.09  R2=0.63  n=17 |
| 7.83 | 0.29±0.07 |
| 7.63 | 0.04±0.05 |
| Infested oysters | 8.03 | 0.12±0.05 | df=14  t=-0.74  p=0.47  R2<0.01  n=16 |
| 7.83 | 0.34±0.16 |
| 7.63 | 0.26±0.14 |
| Sponges | 8.03 | -0.23±0.09 | df=5.23  t=-1.07  p=0.33  R2=0.60  n=16 |
| 7.83 | -0.67±0.25 |
| 7.63 | -0.12±0.12 |
