# Supplementary material for: Effects of ocean acidification on the interaction between calcifying oysters (Ostrea chilensis) and bioeroding sponges (Cliona sp.)
Source: Frontiers journal article supplement (doi:10.3389/fmars.2024.1444863), 2024-10-01
Supplement: Table_8.DOCX [file Table_8.DOCX]

**Table S8.** Interactive effect of pH and Sponge Infestation (yes/no) on clearance rate of uninfested oysters and sponge infested oysters. Model statistics are from full linear mixed effect models.

| **Particle Size Range** | **Treatment** | **Model statistics** | |
| --- | --- | --- | --- |
| >5–60mm | pH | df=27.98, t=2.64, p= **0.01** | R2 = 0.23  n= 33 |
| Sponge infestation | df=23.97, t=2.32, p= **0.03** |
| pH:Sponge Infestation | df=23.96, t=-2.33, p= **0.03** |
| >2.5–60mm | pH | df=13.34, t=2.8, p= **0.01** | R2 = 0.23  n= 33 |
| Sponge infestation | df=23.88, t=2.58, p= **0.02** |
| pH:Sponge Infestation | df=23.82, t=-2.58, p= **0.02** |
| 2.5–5mm | pH | df=13.25, t=2.73, p= **0.02** | R2= 0.24  n= 33 |
| Sponge infestation | df=23.83, t=2.56, p= **0.02** |
| pH:Sponge Infestation | df=23.78, t=-2.56, p= **0.02** |
