# Supplementary material for: Effects of ocean acidification on the interaction between calcifying oysters (Ostrea chilensis) and bioeroding sponges (Cliona sp.)
Source: Frontiers journal article supplement (doi:10.3389/fmars.2024.1444863), 2024-10-01
Supplement: Table_9.DOCX [file Table_9.DOCX]

**Table S9.** Mean (±SE) net chemical bioerosion/ net dissolution rates. Model statistics are from full linear mixed effect models. Negative rates indicate bioerosion (increase in Ca2+ concentration), positive values indicate calcification (decrease in Ca2+ concentration).

| **Category** | **Treatment** | **Mean (±SE)** | **Model statistics** |
| --- | --- | --- | --- |
| Oysters | 8.03 | -0.013±0.007 | df=6.000  t=-0.235  p=0.822  R2=0.008  n=8 |
| 7.63 | -0.011±0.006 |
| Infested oysters | 8.03 | -0.019±0.010 | df=6.000  t=0.807  p=0.451  R2=0.085  n=8 |
| 7.63 | -0.030±0.015 |
| Sponges | 8.03 | -0.933±0.033 | df=1.962  t=1.399  p=0.299  R2=0.832  n=6 |
| 7.63 | -1.558±0.409 |
