# Supplementary material for: Effects of ocean acidification on the interaction between calcifying oysters (Ostrea chilensis) and bioeroding sponges (Cliona sp.)
Source: Frontiers journal article supplement (doi:10.3389/fmars.2024.1444863), 2024-10-01
Supplement: Table_10.DOCX [file Table_10.DOCX]

**Table S10.** Interactive effect of pH and Sponge Infestation (yes/no) on net chemical bioerosion/ net dissolution rates of uninfested oysters and sponge infested oysters. Model statistics are from full linear mixed effect models.

| **Treatment** | **Model statistics** | |
| --- | --- | --- |
| pH | df=12, t=-0.191, p= 0.852 | R2= 0.178  n= 16 |
| Sponge infestation | df=12, t=-0.833, p= 0.421 |
| pH:Sponge Infestation | df=12, t=0.794, p= 0.442 |
