# Supplementary material for: Effects of ocean acidification on the interaction between calcifying oysters (Ostrea chilensis) and bioeroding sponges (Cliona sp.)
Source: Frontiers journal article supplement (doi:10.3389/fmars.2024.1444863), 2024-10-01
Supplement: Table_11.DOCX [file Table_11.DOCX]

**Table S11.** Mean (±SE) oyster condition index for different treatments. Model statistics are from full linear mixed effect models.

| **Category** | **Treatment** | **Mean (±SE)** | **Model statistics** |
| --- | --- | --- | --- |
| Oysters | 8.03 | 3.34±0.15 | df=62  t=-0.22  p=0.824  R2<0.01  n=64 |
| 7.83 | 3.22±0.25 |
| 7.63 | 3.40±0.10 |
| Infested oysters | 8.03 | 3.05±0.22 | df=62  t=-0.189  p=0.851  R2<0.01  n=64 |
| 7.83 | 3.10±0.30 |
| 7.63 | 3.11±0.21 |
