# Supplementary material for: Effects of ocean acidification on the interaction between calcifying oysters (Ostrea chilensis) and bioeroding sponges (Cliona sp.)
Source: Frontiers journal article supplement (doi:10.3389/fmars.2024.1444863), 2024-10-01
Supplement: Table_12.DOCX [file Table_12.DOCX]

**Table S12.** Interactive effect of pH and Sponge Infestation (yes/no) on condition of uninfested oysters and sponge infested oysters. Model statistics are from full linear mixed effect models.

| **Treatment** | **Model statistics** | |
| --- | --- | --- |
| pH | df=16.50, t=-0.19, p= 0.85 | R2= 0.05  n= 64 |
| Sponge infestation | df=118.00, t=0.02, p= 0.98 |
| pH:Sponge Infestation | df=118.00, t=-0.01, p= 0.99 |
