# Supplementary material for: Effects of ocean acidification on the interaction between calcifying oysters (Ostrea chilensis) and bioeroding sponges (Cliona sp.)
Source: Frontiers journal article supplement (doi:10.3389/fmars.2024.1444863), 2024-10-01
Supplement: Table_13.DOCX [file Table_13.DOCX]

**Table S13.** Mean (±SE) raw calcification and bioerosion rates in ΔmgCaCO3 g-1DW day-1 calculated without prior correction for dissolution in control shells.

| **Category** | **Treatment** | **Mean (±SE)** |
| --- | --- | --- |
| Oysters | 8.03 | -1.30±0.23 |
| 7.83 | -1.90±0.21 |
| 7.63 | -2.04±0.19 |
| Infested oysters | 8.03 | -1.35±0.33 |
| 7.83 | -1.69±0.38 |
| 7.63 | -2.83±0.31 |
| Sponges | 8.03 | -6.052±1.03 |
| 7.83 | -11.35±4.56 |
| 7.63 | -18.18±2.54 |
